# Supplementary material
Source: PubMed Central journal article supplement (PMC4300949)
Supplement: NIHMS647299-supplement-Supplementary_Text.pdf [file NIHMS647299-supplement-Supplementary_Text.pdf]

## Whole genome analyses of whole brain data: working within an expanded search space

Sarah E. Medland\*, Neda Jahanshad\*, Benjamin M. Neale, Paul M. Thompson

| YEAR | Imaging Phenotype(s)                                 | Number of imaging measures assessed | Type of genome-wide study  | Sample size | Reported significant after correction? | PubMed ID                |
|------|------------------------------------------------------|-------------------------------------|----------------------------|-------------|----------------------------------------|--------------------------|
| 2005 | leukoariosis and brain atrophy                       | 2                                   | GW micro-satellite markers | 488         | no                                     | <a href="#">15699467</a> |
| 2006 | WMH volume                                           | 1                                   | GW-linkage                 | 747         | yes                                    | <a href="#">16322484</a> |
| 2007 | various regional brain volumes                       | 9                                   | GWAS                       | 705         | no                                     | <a href="#">17903297</a> |
| 2009 | hippocampal atrophy                                  | 1                                   | GWAS                       | 381         | no                                     | <a href="#">19668339</a> |
| 2009 | left dorsal lateral prefrontal cortex activation     | 1                                   | GWAS                       | 172         | no                                     | <a href="#">19065146</a> |
| 2009 | dorsal lateral prefrontal cortex activation          | 2                                   | GWAS                       | 138         | no                                     | <a href="#">19023125</a> |
| 2010 | brain infarct                                        | 1                                   | GWAS                       | 9401        | no                                     | <a href="#">20044523</a> |
| 2010 | brain glutamate concentration                        | 1                                   | GWAS                       | 382         | no                                     | <a href="#">20802204</a> |
| 2010 | WMH volume                                           | 1                                   | bivariate GW linkage       | 357         | yes                                    | <a href="#">20724716</a> |
| 2010 | amygdala activation                                  | 2                                   | GWAS                       | 68          | no                                     | <a href="#">20215924</a> |
| 2010 | temporal lobe volume                                 | 1                                   | GWAS                       | 742         | no                                     | <a href="#">20197096</a> |
| 2010 | voxelwise volume change                              | 31622                               | GWAS                       | 740         | no                                     | <a href="#">20171287</a> |
| 2010 | GM density, volume and cortical thickness            | 142                                 | GWAS                       | 733         | no                                     | <a href="#">20100581</a> |
| 2011 | cortical thickness                                   | 1                                   | GWAS                       | 1054        | yes                                    | <a href="#">21810643</a> |
| 2011 | WMH burden                                           | 1                                   | GWAS                       | 9361        | yes                                    | <a href="#">21681796</a> |
| 2011 | caudate volume                                       | 1                                   | GWAS                       | 1198        | no                                     | <a href="#">21502949</a> |
| 2011 | voxelwise volume change                              | 31622                               | gene-wide(PCR)             | 731         | no                                     | <a href="#">21497199</a> |
| 2011 | hippocampal and entorhinal cortical volume/thickness | 4                                   | GWAS                       | 1004        | no                                     | <a href="#">21116278</a> |
| 2012 | brain size                                           | 1                                   | GWAS                       | 557         | yes                                    | <a href="#">22156575</a> |
| 2012 | auditory cortical activation                         | 2                                   | GW-linkage                 | 212         | yes                                    | <a href="#">23077036</a> |
| 2012 | global FA                                            | 1                                   | GWAS                       | 668         | no                                     | <a href="#">22425255</a> |
| 2012 | global FA                                            | 1                                   | GWAS                       | 150         | no                                     | <a href="#">23218918</a> |
| 2012 | voxelwise volume change                              | 148023                              | genetic pathway            | 253         | N/A                                    | <a href="#">22982105</a> |
| 2012 | surface area of visual cortex                        | 1                                   | GWAS                       | 1181        | yes                                    | <a href="#">22343285</a> |
| 2012 | temporal lobe volume                                 | 1                                   | gene-wide (Lasso)          | 742         | yes                                    | <a href="#">22888310</a> |
| 2012 | top L/R voxel amygdala function                      | 2                                   | GWAS                       | 224         | yes                                    | <a href="#">22856363</a> |
| 2012 | voxelwise fusiform brain                             | 19800                               | GWAS                       | 284         | yes                                    | <a href="#">22828495</a> |

|      | activity                              |    |                      |        |     |                          |
|------|---------------------------------------|----|----------------------|--------|-----|--------------------------|
| 2012 | total, HV and WMH                     | 3  | GWAS                 | 981    | yes | <a href="#">22745009</a> |
| 2012 | FA correlation network                | 18 | GWAS                 | 472    | yes | <a href="#">22723713</a> |
| 2012 | HV, brain volume, ICV                 | 3  | GWAS                 | 21151  | yes | <a href="#">22504417</a> |
| 2012 | brain volume, ICV, head circumference | 3  | GWAS                 | 8175   | yes | <a href="#">22504418</a> |
| 2012 | head circumference                    | 1  | GWAS                 | 19,089 | yes | <a href="#">22504419</a> |
| 2012 | HV                                    | 1  | GWAS                 | 9232   | yes | <a href="#">22504421</a> |
| 2013 | GM thickness                          | 1  | transcriptome-wide   | 379    | yes | <a href="#">23707588</a> |
| 2013 | hippocampal surface regions           | 2  | GWAS                 | 1254   | yes | <a href="#">24579201</a> |
| 2013 | cortical connectivity                 | 59 | GWAS                 | 366    | yes | <a href="#">23471985</a> |
| 2013 | lesional voxels                       | 3  | GWAS                 | 284    | no  | <a href="#">23412934</a> |
| 2013 | gray matter volume                    | 3  | GWAS                 | 125    | no  | <a href="#">24086445</a> |
| 2013 | hippocampal volume                    | 1  | GWAS                 | 328    | no  | <a href="#">23805179</a> |
| 2013 | L/R HV and entorhinal cortex volumes  | 4  | SNP-SNP interactions | 577    | yes | <a href="#">23107432</a> |
| 2013 | lentiform nucleus volume              | 1  | GWAS                 | 1345   | yes | <a href="#">22903471</a> |
| 2014 | AB load                               | 1  | GWAS                 | 555    | yes | <a href="#">23419831</a> |

**Supplementary Table 1.** Here we summarize neuroimaging GWAS studies found through a literature search. This table includes genome-wide studies of cohorts evaluated at a single site, and from multi-site neuroimaging initiatives such as IMAGEN, fBIRN, PING and ADNI, and from still larger consortia, such as CHARGE and ENIGMA, which combine data from many of these groups and others. GM: gray matter; WM: white matter; WMH: white matter hyperintensities; ICV: intracranial volume; HV: hippocampal volume; L/R: left or right; AB: amyloid -Beta; FA: fractional anisotropy.
